# Supplementary material for: Practical learnings from an epidemiology study on TDI-related occupational asthma: Part I—Cumulative exposure is not a good indicator of risk
Source: PubMed Central journal article supplement — Toxicol Ind Health. 2020 Aug 31;36(11):876–84. doi: 10.1177/0748233720947202 (PMC7750668; doi:10.1177/0748233720947202), 2020-08-31
Supplement: Part_I-Supplemental_Information_1.pdf [file Part_I-Supplemental_Information_1.pdf]

**Practical learnings from an epidemiology study on TDI-related occupational asthma. Part I - Cumulative exposure is not a good indicator of risk.**

**Supplemental Information - 1**

**Criteria for selection of papers for comparison to Collins et al. (2017)**

A literature search of both publicly available studies and internal International Isocyanate Institute studies that included respiratory effects and isocyanate exposure was conducted. In addition, citations contained in several key reviews and recent authoritative publications were also considered (Agence nationale de sécurité sanitaire de l'alimentation, de l'environnement et du travail (ANSES), 2019; American Conference of Governmental and Industrial Hygienists (ACGIH), 2016; Daniels, 2018; European Chemicals Agency (ECHA), 2019; Greim and Deutsche Forschungsgemeinschaft (DFG), 2003; Health Council of the Netherlands, 2018; Lynch et al., 2018; Ott et al., 2003).

From this list, the following criteria were applied:

- Studies were included that reported (or gave sufficient information to allow the calculation of) asthma incidence rates. Studies that only reported changes in lung function were excluded, as were studies that only assessed immune status (e.g. IgG, IgE levels).
- Studies that included more than one diisocyanate were excluded; only studies in TDI workers were included to minimize potential confounding.
- Studies where diisocyanates were generated from thermal decomposition of polyurethane were excluded, as this does not solely represent exposure to the intact diisocyanate moiety.
- Cross-sectional studies were excluded because of a lack of continuous industrial hygiene measurements and follow-up of the population.

This process resulted in the studies in **Table S1-1** being selected as relevant for comparison to Collins et al. (2017). **Table S1-2** gives an overview of all studies screened.

*TDI exposure: practical learnings – Part I – Supplemental Information 1*

| Reference                                  | Study Type   | Study Size | Reported TDI Concentrations                                                                                                                                                                                                                            | Asthma                                                                                                                                  |
|--------------------------------------------|--------------|------------|--------------------------------------------------------------------------------------------------------------------------------------------------------------------------------------------------------------------------------------------------------|-----------------------------------------------------------------------------------------------------------------------------------------|
| Bodner et al. (2001)                       | Longitudinal | N=305      | 8-hr TWA TDI values of $2.3 \pm 1$ ppb<br><br>After 1980, mean TWA concentrations were below 5 ppb for all job categories.<br><br>Mean cumulative dose $97 \pm 111$ ppb.months                                                                         | 10 asthma cases identified between 1971 - 1997.                                                                                         |
| Bugler et al. (1991)                       | Longitudinal | N=1,462    | 8-hr TWA TDI values reported by job<br>Production: 1.6-2.6 ppb<br>Finishing: 0.9-1.6 ppb<br><br>22 % and 10 % of 8-hr TWA samples exceeded 20 ppb and 40 ppb, respectively.                                                                            | 81 cases of respiratory sensitization diagnosed, of those 41 diagnosed between 1981-1986.                                               |
| Diem et al. (1982);<br>Weill et al. (1981) | Longitudinal | N=277      | 8-hr TWA TDI values reported by job<br>Mean 8-hr TWA: 2 ppb<br>Low-High: 1.6-6.8 ppb<br><br>In high exposure jobs, 8-hr TWA values exceeded 5 ppb and 20 ppb during 15 % and 10 % of the time, respectively.                                           | 12 cases of respiratory sensitization diagnosed between 1973-1978<br>Yearly incidence rate: 1.0 %                                       |
| Jones et al. (1992)                        | Longitudinal | N=386      | 8-hr TWA TDI values reported by job<br>Production: 2.9-4.5 ppb<br>Finishing: 1.4-1.5 ppb<br><br>In production jobs, 8-hr TWA values exceeded 20 ppb for 3 % of the time.                                                                               | 12 cases diagnosed between 1982-1986                                                                                                    |
| Ott et al. (2000)                          | Longitudinal | N=297      | 8-hr TWA TDI values reported by period and job<br>1967-1980 - low-high: 3.4-10.1 ppb<br>1980-1997 - low-high: 0.3-2.7 ppb<br><br>Between 1976-1988, 36 % and 59 % of 8-hr TWA values exceeded 20 ppb in moderate and high exposure jobs, respectively. | 19 cases of respiratory sensitization diagnosed between 1967 - 1976.<br>Yearly incidence rates:<br>1967-1979: 1.8 %<br>1980-1996: 0.7 % |

**Table S1-1** - Results of a literature search criteria-screened to identify studies relevant for comparison to Collins et al. (2017).

| Citation                            | Unable to report asthma incidence or prevalence | Cross sectional study design | Exposed to multiple diisocyanates or decomposition products |
|-------------------------------------|-------------------------------------------------|------------------------------|-------------------------------------------------------------|
| Adams (1975)                        | ✓                                               |                              |                                                             |
| Belin et al. (1983)                 | ✓                                               |                              |                                                             |
| Bruckner et al. (1968)              | ✓                                               |                              |                                                             |
| Butcher et al. (1977)               | ✓                                               |                              |                                                             |
| Clark et al. (1998); Allport (1994) | ✓                                               |                              |                                                             |
| Clark et al. (2003)                 | ✓                                               |                              |                                                             |
| Daftarian et al. (2000)             |                                                 | ✓                            |                                                             |
| Daftarian et al. (2002)             |                                                 | ✓                            |                                                             |
| Franzinelli et al. (1978)           |                                                 | ✓                            |                                                             |
| Gee and Morgan (1985)               | ✓                                               |                              | MDI and TDI exposures                                       |
| Gui et al. (2014)                   | ✓                                               |                              |                                                             |
| Holness et al. (1984)               | ✓                                               |                              |                                                             |
| Huang et al. (1991)                 | ✓                                               |                              |                                                             |
| Kim et al. (1997)                   | ✓                                               |                              |                                                             |
| Lee and Phoon (1992)                | ✓                                               |                              |                                                             |
| Meredith et al. (2000)              |                                                 | ✓                            |                                                             |
| Musk et al. (1982)                  | ✓                                               |                              |                                                             |
| Musk et al. (1985)                  | ✓                                               |                              |                                                             |
| Olsen et al. (1989)                 | ✓                                               |                              |                                                             |
| Omae (1984)                         | ✓                                               |                              |                                                             |
| Omae et al. (1992)                  | ✓                                               |                              |                                                             |
| Omae (1994)                         | ✓                                               |                              |                                                             |
| Peters et al. (1968)                | ✓                                               |                              |                                                             |
| Peters and Wegman (1975)            | ✓                                               |                              |                                                             |
| Porter et al. (1975)                | ✓                                               |                              |                                                             |
| Venables et al. (1985)              |                                                 | ✓                            |                                                             |
| Wang et al. (1988)                  |                                                 | ✓                            |                                                             |
| Wegman et al. (1977)                | ✓                                               |                              |                                                             |
| Wegman et al. (1974)                | ✓                                               |                              |                                                             |
| Wegman et al. (1982)                | ✓                                               |                              |                                                             |
| White et al. (1980)                 |                                                 |                              | PU degradation products                                     |
| Williamson (1964)                   | ✓                                               |                              |                                                             |
| Woodbury (1956)                     | ✓                                               |                              |                                                             |

**Table S1-2** - Studies from a literature search which were eliminated from consideration for comparison to Collins et al. (2017) based on screening criteria.

## References

- Adams WGF (1975) Long-term effects on the health of men engaged in the manufacture of tolylene diisocyanate. *British Journal of Industrial Medicine* 32: 72-78.
- Agence nationale de sécurité sanitaire de l'alimentation de l'environnement et du travail (ANSES) (2019) *Expert appraisal on recommending occupational exposure limits for chemical agents: Assessment of health effects and methods for the measurement of exposure levels in workplace atmospheres for toluene diisocyanate mixed isomers (TDI) CAS N° 26471-62-5*. Paris, F: ANSES.
- Allport DC (1994) *Development of respiratory sensitisation in a UK TDI foam worker population. Further evaluation of Ill report 10848: The acute and long-term respiratory effects of aromatic diisocyanate: a five year longitudinal study of polyurethane foam workers*. Manchester, UK: International Isocyanate Institute.
- American Conference of Governmental Industrial Hygienists (ACGIH) (2016) *Toluene diisocyanate, 2,4- or 2,6- (or as a mixture) [newly adopted TLV documentation]*. Cincinnati, OH, USA: American Conference of Governmental and Industrial Hygienists.
- Belin L, Wass U, Audunsson G, et al. (1983) Amines: possible causative agents in the development of bronchial hyperreactivity in workers manufacturing polyurethanes from isocyanates. *British Journal of Industrial Medicine* 40: 251-257.
- Bodner KM, Burns CJ, Randolph NM, et al. (2001) A longitudinal study of respiratory health of toluene diisocyanate production workers. *Journal of Occupational and Environmental Medicine* 43: 890-897.
- Bruckner HC, Avery SB, Stetson DM, et al. (1968) Clinical and immunologic appraisal of workers exposed to diisocyanates. *Archives of Environmental Health* 16: 619-625.
- Bugler J, Clark RL, Hill ID, et al. (1991) *The acute and long-term respiratory effects of aromatic diisocyanates: a five year longitudinal study of polyurethane foam workers*. Manchester, UK: International Isocyanate Institute.
- Butcher BT, Jones RN, O'Neil CE, et al. (1977) Longitudinal study of workers employed in the manufacture of toluene-diisocyanate. *The American Review of Respiratory Disease* 116: 411-421.
- Clark RL, Bugler J, McDermott M, et al. (1998) An epidemiology study of lung function changes of toluene diisocyanate foam workers in the United Kingdom. *International Archives of Occupational and Environmental Health* 71: 169-179.
- Clark RL, Bugler J, Paddle GM, et al. (2003) A 17-year epidemiological study on changes in lung function in toluene diisocyanate foam workers. *International Archives of Occupational and Environmental Health* 76: 295-301.
- Collins JJ, Anteau S, Conner PR, et al. (2017) Incidence of occupational asthma and exposure to toluene diisocyanate in the United States toluene diisocyanate production industry. *Journal of Occupational and Environmental Medicine* 59: S22-27.
- Daftarian HS, Lushniak BD, Reh CM, et al. (2002) Evaluation of self-reported skin problems among workers exposed to toluene diisocyanate (TDI) at a foam manufacturing facility. *Journal of Occupational and Environmental Medicine* 44: 1197-1202.
- Daftarian HS, Roegner KC and Reh CM (2000) *Health Hazard Evaluation Report: Woodbridge Corporation, Brodhead, Wisconsin. HETA 98-0011-2801*. Cincinnati, OH, USA: National Institute for Occupational Safety and Health.
- Daniels RD (2018) Occupational asthma risk from exposures to toluene diisocyanate: a review and risk assessment. *American Journal of Industrial Medicine* 61: 282-292.

- Diem JE, Jones RN, Hendrick DJ, et al. (1982) Five-year longitudinal study of workers employed in a new TDI manufacturing plant. *The American Review of Respiratory Disease* 126: 420-428.
- European Chemicals Agency (ECHA) (2019) *ECHA scientific report for evaluation of limit values for diisocyanates at the workplace*. Helsinki, FI: European Chemicals Agency.
- Franzinelli A, Mariotti F and Innocenti A (1978) Respiratory pathology of isocyanates in a refrigerator factory. *La Medicina del Lavoro* 69: 163-170.
- Gee JB and Morgan WKC (1985) A 10-year follow-up study of a group of workers exposed to isocyanates. *Journal of Occupational Medicine* 27: 15-18.
- Greim H and Deutsche Forschungsgemeinschaft (DFG) (2003) Toluene diisocyanate. In: *Occupational Toxicants: Critical Data Evaluation for MAK Values and Classification of Carcinogens, Vol.20. Greim H. ed., 2003, 291-338*. Bonn, D: Deutsche Forschungsgemeinschaft.
- Gui W, Wisniewski AV, Neamtii I, et al. (2014) Inception cohort study of workers exposed to toluene diisocyanate at a polyurethane foam factory: Initial one-year follow-up. *American Journal of Industrial Medicine* 57: 1207-1215.
- Health Council of the Netherlands (2018) *Di- and triisocyanates. The Hague: Health Council of the Netherlands, 2018; publication no. 2018/20*. The Hague, NL: Health Council of the Netherlands.
- Holness DL, Broder I, Corey PN, et al. (1984) Respiratory variables and exposure-effect relationships in isocyanate-exposed workers. *Journal of Occupational Medicine* 26: 449-455.
- Huang J, Wang XP, Chen BM, et al. (1991) Immunological effects of toluene diisocyanate exposure on painters. *Archives of Environmental Contamination and Toxicology* 21: 607-611.
- Jones RN, Rando RJ, Glindmeyer HW, et al. (1992) Abnormal lung function in polyurethane foam producers: weak relationship to measured TDI exposures. *The American Review of Respiratory Disease* 146: 871-877.
- Kim H, Kim YD and Choi J (1997) Seroimmunological characteristics of Korean workers exposed to toluene diisocyanate. *Environmental Research* 75: 1-6.
- Lee HS and Phoon WH (1992) Diurnal variation in peak expiratory flow rate among workers exposed to toluene diisocyanate in the polyurethane foam manufacturing industry. *British Journal of Industrial Medicine* 49: 423-427.
- Lynch HN, Prueitt RL and Goodman JE (2018) Critique of the ACGIH 2016 derivation of toluene diisocyanate Threshold Limit Values. *Regulatory Toxicology and Pharmacology* 97: 189-196.
- Meredith SK, Bugler J and Clark RL (2000) Isocyanate exposure and occupational asthma: a case-referent study. *Occupational and Environmental Medicine* 57: 830-836.
- Musk AW, Peters JM and Bernstein L (1985) Absence of respiratory effects in subjects exposed to low concentrations of TDI and MDI: a reevaluation. *Journal of Occupational Medicine* 27: 917-920.
- Musk AW, Peters JM, DiBerardinis L, et al. (1982) Absence of respiratory effects in subjects exposed to low concentrations of TDI and MDI. *Journal of Occupational Medicine* 24: 746-750.
- Olsen GW, Shellenberger R, Bodner KM, et al. (1989) An epidemiological investigation of forced expiratory volume at 1 second and respiratory symptoms among employees of a toluene diisocyanate production plant. *Journal of Occupational Medicine* 31: 664-667.
- Omae K (1984) Two-year observation of pulmonary function in workers exposed to low concentrations of toluene diisocyanate. *International Archives of Occupational and Environmental Health* 55: 1-12.
- Omae K (1994) [Cohort studies of effects of long-term toluene diisocyanate (TDI) exposure on pulmonary function]. *Nihon Eiseigaku Zasshi* 48: 1017-1026.
- Omae K, Nakadate T, Higashi T, et al. (1992) Four-year follow-up of effects of toluene diisocyanate exposure on the respiratory system in polyurethane foam manufacturing workers. I. Study design and results of the first cross-sectional observation. *International Archives of Occupational and Environmental Health* 63: 559-564.

- Ott MG, Diller WF and Jolly AT (2003) Respiratory effects of toluene diisocyanate in the workplace: a discussion of exposure-response relationships. *Critical Reviews in Toxicology* 33: 1-59.
- Ott MG, Klees JE and Poche SL (2000) Respiratory health surveillance in a toluene di-isocyanate production unit, 1967-97: clinical observations and lung function analyses. *Occupational and Environmental Medicine* 57: 43-52.
- Peters JM, Murphy RLH, Pagnotto LD, et al. (1968) Acute respiratory effects in workers exposed to low levels of toluene diisocyanate (TDI). *Archives of Environmental Health* 16: 642-647.
- Peters JM and Wegman DH (1975) Epidemiology of toluene diisocyanate (TDI)-induced respiratory disease. *Environmental and Health Perspectives* 11: 97-100.
- Porter CV, Higgins RL and Scheel LD (1975) A retrospective study of clinical, physiologic and immunologic changes in workers exposed to toluene diisocyanate. *American Industrial Hygiene Association Journal* 36: 159-168.
- Venables KM, Dally MB, Burge PS, et al. (1985) Occupational asthma in a steel coating plant. *British Journal of Industrial Medicine* 42: 517-524.
- Wang JD, Huang PH, Lin JM, et al. (1988) Occupational asthma due to toluene diisocyanate among Velcro-like tape manufacturers. *American Journal of Industrial Medicine* 14: 73-78.
- Wegman DH, Musk AW, Main DM, et al. (1982) Accelerated loss of FEV-1 in polyurethane production workers: a four-year prospective study. *American Journal of Industrial Medicine* 3: 209-215.
- Wegman DH, Pagnotto LD, Fine LJ, et al. (1974) A dose-response relationship in TDI workers. *Journal of Occupational Medicine* 16: 258-260.
- Wegman DH, Peters JM, Pagnotto L, et al. (1977) Chronic pulmonary function loss from exposure to toluene diisocyanate. *British Journal of Industrial Medicine* 34: 196-200.
- Weill H, Butcher B, Dharmarajan V, et al. (1981) *Respiratory and immunologic evaluation of isocyanate exposure in a new manufacturing plant*. NIOSH Technical Report Publication No. 81-125. Morgantown, WV, USA: National Institute of Occupational Safety and Health.
- White WG, Morris MJ, Sugden E, et al. (1980) Isocyanate-induced asthma in a car factory. *Lancet* 1(8171): 756-760.
- Williamson KS (1964) Studies of diisocyanate workers. *Transactions of the Association of Industrial Medicine Officers* 14: 81-88.
- Woodbury JW (1956) Asthmatic syndrome following exposure to tolylene diisocyanate. *Industrial Medicine and Surgery* 25: 540-543.
