# Supplementary material for: Practical learnings from an epidemiology study on TDI-related occupational asthma: Part I—Cumulative exposure is not a good indicator of risk
Source: PubMed Central journal article supplement — Toxicol Ind Health. 2020 Aug 31;36(11):876–84. doi: 10.1177/0748233720947202 (PMC7750668; doi:10.1177/0748233720947202), 2020-08-31
Supplement: Part_I-Supplemental_Information_3.pdf [file Part_I-Supplemental_Information_3.pdf]

**Practical learnings from an epidemiology study on TDI-related occupational asthma. Part I -  
Cumulative exposure is not a good indicator of risk.**

**Supplemental Information - 3**

**Data verification – Methods and comparison**

*Workplace atmosphere measurements*

TWA exposure values were calculated from the raw workplace analysis data as the sum of 2,4- and 2,6-TDI, as documented, i.e. not converted to an 8-hour value. To maintain comparability with Middendorf et al. (2017), only TWA-samples marked as “Routine” were considered, regardless of the use of respiratory protection, and half the detection limit was used for “non-detects” to calculate cumulative exposure values.

TWA-8 (8-hour adjusted) values were calculated by adjusting for shift duration in accordance with Eq.1:

$$\text{TWA-8} = (\text{measured TWA value}) \cdot (\text{shift duration [min]}) / 480 \text{ [min]} \quad [\text{Eq.1}]$$

For this reevaluation, TWA-8 values take into account all recorded samples. This includes samples taken under non-routine conditions (“Start-up”, “Upset” and “Turnaround”), since these are the circumstances that would typically contribute to peak or unexpected exposures.

The Similar Exposure Groups based upon plant and job function (Plant/SEGs) as defined by Middendorf et al. (2017) were used unaltered in the present review.

*Comparison of distribution of TWA-values*

To ensure distributions of TWA-values were consistent with those reported by Middendorf et al. (2017), the natural logarithm (LN) of the TWA-values was taken and the respective average ( $\mu_L$ ) and standard deviation ( $\sigma_L$ ) of the LN-converted data sets were determined per Plant/SEG. The corresponding geometric means (GM) and geometric standard deviations (GSD) were then calculated using Eqs. 2 and 3:

$$\text{GM} = \exp(\mu_L) \quad [\text{Eq. 2}]$$

$$\text{GSD} = \exp(\sigma_L) \quad [\text{Eq. 3}]$$

Based upon the assumption that the TWA-values would be log-normally distributed (see **Figure S3-1**), the GM and GSD can then be used to reconstitute the average ( $\mu_T$ ) of the corresponding non-transformed TWA-distributions, as given by Eq. 4:

$$\mu_T = \exp(\mu_L + \sigma_L^2/2) \quad [\text{Eq. 4}]$$

The average of the actual (not LN-converted) TWA-values ( $\mu_A$ ) was calculated per Plant/SEG as well.

#### *Distribution of TWA-values*

**Table S3-1** summarizes the descriptive statistics of the Plant/SEGs' TWA-distributions as reported in Middendorf et al. (2017) and as recalculated for this reevaluation.

The nomenclature in the "Plant/SEG" column of **Table S3-1** refers to the job function (see caption) and the number refers to the respective TDI production plant.

**Table S3-1** confirms data consistency: the GM and GSD determined by Middendorf et al. (2017) and those determined from the anonymized data in this work nearly coincide (Columns [1] and [4], and Columns [2] and [5] respectively). **Table S3-1** also demonstrates the important difference between the GM (Column [1]) and the average value - be it  $\mu_T$  (Column [3]) or  $\mu_A$  (Column [6]) - of the TWA distributions. Hence, large differences can be expected in the cumulative exposure calculated in this work in comparison to the cumulative exposure calculated by Middendorf et al. (2017) and used by Collins et al. (2017) for correlation with incidence of cases consistent with TDI-induced asthma.

|                  | Plant/SEG    | GM (ppb) [1]             | GSD (ppb) [2] | $\mu_T$ (ppb) [3] | GM (ppb) [4] | GSD (ppb) [5] | $\mu_A$ (ppb) [6] |
|------------------|--------------|--------------------------|---------------|-------------------|--------------|---------------|-------------------|
|                  |              | Middendorf et al. (2017) |               |                   | This work    |               |                   |
| Support-SEG      | Chem - 2     | 0.027                    | 1.54          | 0.030             | 0.027        | 1.50          | 0.029             |
| “Support”        | C_R_Op - 2   | 0.025                    | 1.55          | 0.028             | 0.025        | 1.54          | 0.027             |
|                  | C_R_Op - 3   | 0.039                    | 2.27          | 0.055             | 0.039        | 2.27          | 0.117             |
|                  | EngSup - 1   | 0.036                    | 1.88          | 0.044             | 0.035        | 1.81          | 0.069             |
|                  | EngSup - 2   | 0.026                    | 1.40          | 0.028             | 0.025        | 1.46          | 0.027             |
|                  | ShiftSup - 1 | 0.042                    | 2.07          | 0.055             | 0.042        | 2.05          | 0.068             |
|                  | ShiftSup - 3 | 0.043                    | 2.02          | 0.043             | 0.043        | 2.02          | 0.062             |
|                  | Tech - 2     | 0.026                    | 1.66          | 0.026             | 0.026        | 1.65          | 0.030             |
| Maintenance-SEG  | Inst - 1     | 0.064                    | 3.14          | 0.123             | 0.063        | 3.11          | 0.173             |
| “Maintenance”    | Inst - 2     | 0.025                    | 1.62          | 0.028             | 0.025        | 1.63          | 0.028             |
|                  | Inst - 3     | 0.052                    | 2.96          | 0.094             | 0.049        | 2.85          | 0.217             |
|                  | Lab - 1      | 0.069                    | 2.97          | 0.125             | 0.069        | 2.93          | 0.289             |
|                  | Lab - 2      | 0.029                    | 2.05          | 0.038             | 0.029        | 1.98          | 0.039             |
|                  | Lab - 3      | 0.038                    | 1.94          | 0.047             | 0.038        | 1.93          | 0.068             |
|                  | Maint - 2    | 0.034                    | 2.31          | 0.048             | 0.032        | 2.27          | 0.062             |
|                  | Maint - 3    | 0.083                    | 3.72          | 0.197             | 0.075        | 3.55          | 0.203             |
| Field-SEG        | FieldOp - 1  | 0.094                    | 4.41          | 0.283             | 0.094        | 4.41          | 0.526             |
| “Field Operator” | FieldOp - 2  | 0.042                    | 3.51          | 0.092             | 0.039        | 3.34          | 0.291             |
|                  | FieldOp - 3  | 0.150                    | 6.97          | 0.988             | 0.142        | 6.83          | 2.047             |
| Load-SEG         | Load - 1     | 0.290                    | 8.90          | 3.163             | 0.294        | 8.83          | 3.359             |
| “Loading”        | Load - 2     | 0.089                    | 4.58          | 0.283             | 0.084        | 4.69          | 0.298             |
|                  | Load - 3     | 0.430                    | 4.64          | 1.396             | 0.420        | 4.52          | 1.145             |

**Table S3-1** – Comparison of GM and GSD published by Middendorf et al. (2017) with those of this review. Comparison of TWA-averages calculated from GM and GSD ( $\mu_T$ ) per Middendorf et al. (2017), which are based upon the assumption that TWA-values would be log-normally distributed, and the averages derived from the actual TWA-measurements ( $\mu_A$  - this review). All values are in ppb. [Nomenclature: (process) Chem(ist), C(ontrol)\_R(oom)\_Op(erator), Eng(ineering) Sup(ervisor), Shift Sup(ervisor), Tech(nician), Inst(rumentation technician), Lab(oratory), Maint(enance technician), Field Op(erator), Load(ing operator)].

**Figure S3-1** compares the distribution of the natural logarithms of all TWA-values in this data set with a typical log-normally distributed set of values as reported by Weill et al. (1981) and Diem et al. (1982) for instance. LN(TWA)-values below -2.5 typically represent values below the limit of detection (LoD) of the analysis technique.

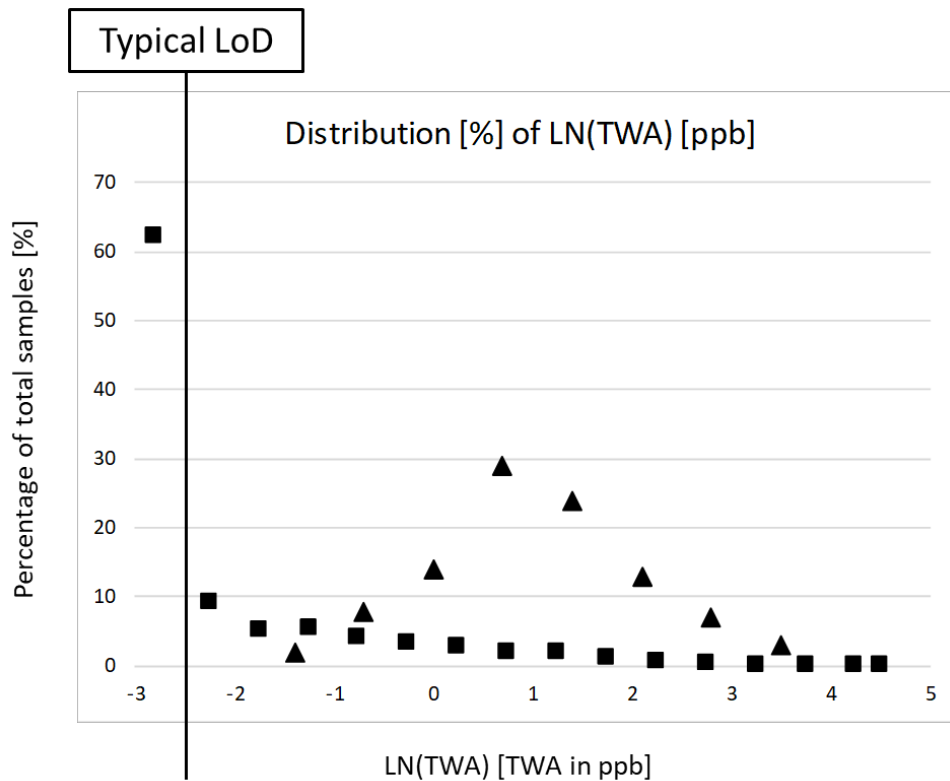

**Figure S3-1** – Comparison of the distribution of natural logarithms of TWA-values. X-axis: LN(TWA), TWA in ppb; y-axis: % of total samples. Squares: all “Routine” TWA-samples in this work; triangles: rendering of a typical log-normal distribution from Weill et al. (1981). X-axis values below -2.5 typically correspond to values below the limit of detection (LoD).

Whereas a log-normal distribution could be assumed for this data set as well, it is clear from **Figure S3-1** that that distribution would be ill-defined, because the majority of TWA-values is based upon assumed values below the detection limit. Hence, for this reanalysis, the average of the actual (not LN-converted) TWA-values ( $\mu_A$ ) was chosen as a basis to calculate cumulative exposure. A sensitivity was performed using  $\mu_T$  (see Middendorf et al., 2017) as an alternative assumption.
