# Supplementary material for: Practical learnings from an epidemiology study on TDI-related occupational asthma: Part I—Cumulative exposure is not a good indicator of risk
Source: PubMed Central journal article supplement — Toxicol Ind Health. 2020 Aug 31;36(11):876–84. doi: 10.1177/0748233720947202 (PMC7750668; doi:10.1177/0748233720947202), 2020-08-31
Supplement: Part_I-Supplemental_Information_5.pdf [file Part_I-Supplemental_Information_5.pdf]

**Practical learnings from an epidemiology study on TDI-related occupational asthma. Part I -  
Cumulative exposure is not a good indicator of risk.**

**Supplemental Information - 5**

**Sensitivity analyses**

*Potential shift overtime*

Gross cumulative exposure has been calculated as described in the Methods section assuming that every participant worked a similar number of hours per year.

However, overtime is a common occurrence in shift work to cover for vacation and sick time. The relationship between asthma incidence and gross cumulative exposure was investigated assuming a high but not uncommon overtime rate of 30% for shift workers as a potential alternate data assumption.

**Figure S5-1** shows the histogram of gross cumulative exposure values in the same format as Figure 1. Compared to Figure 1, gross cumulative exposure for shift workers has shifted to higher values in its entirety.

**Table S5-1** provides the overview of incidence rates in the same format as Table 2.

The 178 data points were analyzed by logistic regression. The slope parameter was not significant ( $P=0.35$  for a linear model), neither was the goodness-of-fit ( $P=0.37$ ): both indicating no significant relationship between this potential alternate adjusted gross exposure and asthma incidence.

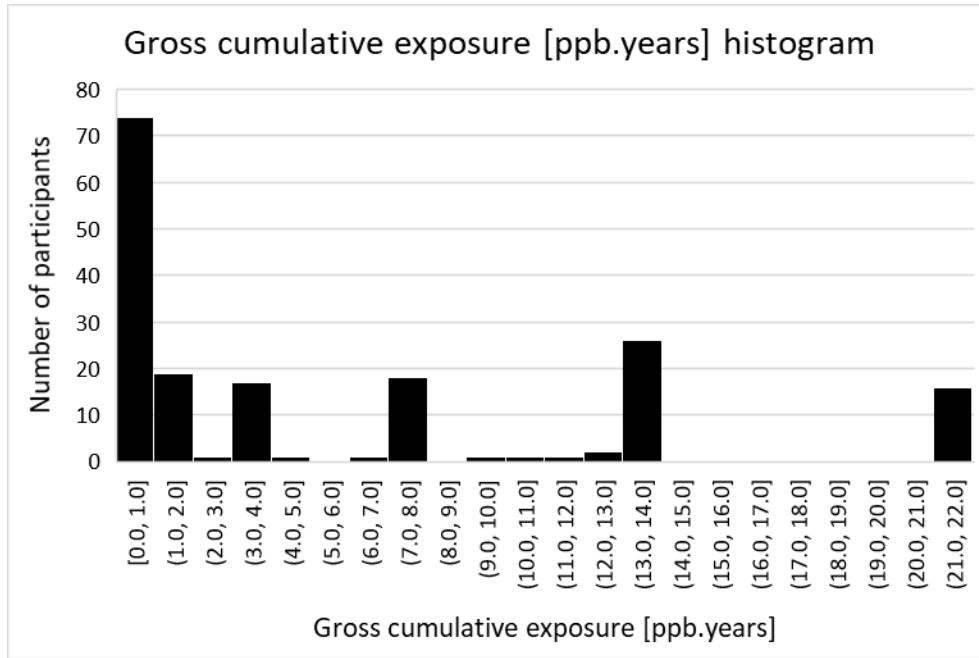

**Figure S5-1** – Histogram of calculated gross cumulative exposure values. X-axis: intervals of gross cumulative exposure values [ppb.years]; y-axis: number of participants. Sensitivity on gross cumulative exposure by assuming 30% overtime for shift work.

| Gross cumulative exposure [ppb.years] | <2      |        | 2-4  | 4-10 | 10-16 | >16  |
|---------------------------------------|---------|--------|------|------|-------|------|
| SEG                                   | Support | Others |      |      |       |      |
| Number of participants                | 46      | 47     | 18   | 21   | 30    | 16   |
| Number of asthma cases                | 0       | 2      | 1    | 1    | 2     | 1    |
| Participant-years                     | 190     | 201    | 83   | 87   | 144   | 80   |
| Incidence per hundred person-years    | 0       | 1.00   | 1.21 | 1.15 | 1.39  | 1.25 |

**Table S5-1** – Incidence of TDI-related asthma as a function of gross cumulative exposure categories derived from **Figure S5-1**. Sensitivity on gross cumulative exposure by assuming 30% overtime for shift work. Incidence per hundred person-years of study participation. The overall incidence is 0.9 per hundred person-years.

*Use of  $\mu_T$  instead of  $\mu_A$  as an average*

Gross cumulative exposure has been calculated as described in the Methods section based upon the average of TWA-values as measured ( $\mu_A$ ).

It was investigated whether replacing the average TWA-values ( $\mu_A$ ) with the reconstituted value calculated from the log-transformed TWA-distributions ( $\mu_T$ ), which assumes that the TWA-values would be log-normally distributed (as described by Middendorf et al., 2017), would affect the outcome.

**Figure S5-2** shows the histogram of gross cumulative exposure values in the same format as Figure 1. Compared to Figure 1, gross cumulative exposure for this alternate case has generally shifted to lower values.

**Table S5-2** provides the overview of incidence rates in the same format as Table 2.

The 178 data points were analyzed by logistic regression. The slope parameter was not significant ( $P=0.34$  for a linear model), neither was the goodness-of-fit ( $P=0.38$ ): both indicating no significant relationship between the adjusted gross exposure and asthma incidence for this potential alternate data assumption.

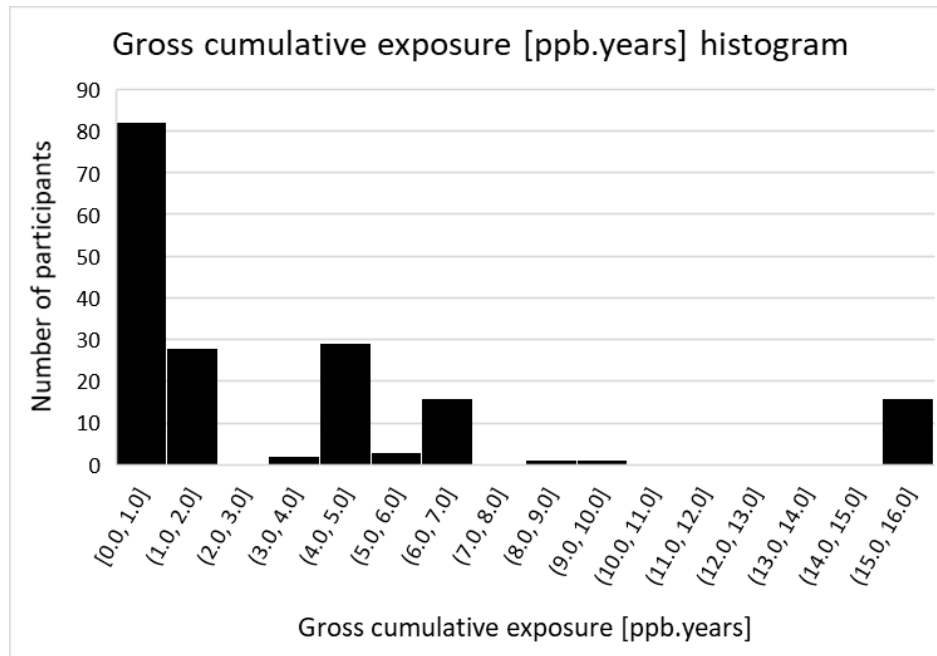

**Figure S5-2** – Histogram of calculated gross cumulative exposure values. X-axis: intervals of gross cumulative exposure values [ppb.years]; y-axis: number of participants. Sensitivity on use of  $\mu_T$  instead of  $\mu_A$ .

| Gross cumulative exposure [ppb.years] | <1      |        | 1-3  | 3-6  | 6-10 | >10  |
|---------------------------------------|---------|--------|------|------|------|------|
| SEG                                   | Support | Others |      |      |      |      |
| Number of participants                | 46      | 30     | 34   | 34   | 18   | 16   |
| Number of asthma cases                | 0       | 2      | 1    | 2    | 1    | 1    |
| Participant-years                     | 190     | 122    | 159  | 151  | 83   | 80   |
| Incidence per hundred person-years    | 0       | 1.64   | 0.63 | 1.33 | 1.21 | 1.25 |

**Table S5-2** – Incidence of TDI-related asthma as a function of gross cumulative exposure categories derived from **Figure S5-2**. Sensitivity on use of  $\mu_T$  instead of  $\mu_A$ . Incidence per hundred person-years of study participation. The overall incidence is 0.9 per hundred person-years.
